# Supplementary material for: Trends in Obstetrics and Gynecology Residency Applications in the Year After Abortion Access Changes
Source: PubMed Central journal article supplement (PMC10851098; doi:10.1001/jamanetworkopen.2023.55017), 2024-02-07
Supplement: jamanetwopen-e2355017-s001.pdf [file jamanetwopen-e2355017-s001.pdf]

## Data Sharing Statement

Hammoud. Trends in Obstetrics and Gynecology Residency Applications in the Year After Abortion Access Changes. *JAMA Netw Open*. Published February 07, 2024.  
doi:10.1001/jamanetworkopen.2023.55017

### Data

**Data available:** No
